# Supplementary material for: Reforming of ethanol with carbon dioxide catalysed by silver-promoted copper–ceria–zirconia composites
Source: Royal Society of Chemistry journal article supplement (doi:10.1039/d3se01476b), 2024-01-01
Supplement: d3se01476b1.pdf [file d3se01476b1.pdf]

## Table S1 TG-DTA measurement of $\text{AgCuCeO}_2\text{ZrO}_2$ catalysts at each temperature

| Catalysts                 | 200-400<br>(°C) | 400-600<br>(°C) | 600-800<br>(°C) | Total<br>(mg) |
|---------------------------|-----------------|-----------------|-----------------|---------------|
| <b>1Ag9Cu45Ce45Zr</b>     | <b>0.20</b>     | <b>1.17</b>     | <b>2.07</b>     | <b>3.44</b>   |
| <b>2Ag8Cu22.5Ce67.5Zr</b> | <b>0.28</b>     | <b>1.28</b>     | <b>1.71</b>     | <b>3.27</b>   |
| <b>2Ag8Cu45Ce45Zr</b>     | <b>0.62</b>     | <b>0.3</b>      | <b>0.59</b>     | <b>1.51</b>   |
| <b>2Ag8Cu67.5Ce22.5Zr</b> | <b>0.04</b>     | <b>2.32</b>     | <b>1.87</b>     | <b>4.23</b>   |
| <b>3Ag7Cu45Ce45Zr</b>     | <b>-0.03</b>    | <b>0.43</b>     | <b>3.39</b>     | <b>3.79</b>   |
| <b>10Cu45Ce45Zr</b>       | <b>0.11</b>     | <b>0.96</b>     | <b>2.13</b>     | <b>3.21</b>   |

**Table S2 Nitrogen adsorption-desorption measurement of AgCuCeO<sub>2</sub>ZrO<sub>2</sub> catalysts.**

| Sample name          | BET SA* <sup>1</sup><br>(m <sup>2</sup> /g) | Total PV* <sup>2</sup><br>(cm <sup>3</sup> /g) | Avg. PD* <sup>3</sup><br>(nm) | BJH SA* <sup>1</sup><br>(m <sup>2</sup> /g) | BJH PV* <sup>2</sup><br>(cm <sup>3</sup> /g) | BJH PD* <sup>3</sup><br>(nm) |
|----------------------|---------------------------------------------|------------------------------------------------|-------------------------------|---------------------------------------------|----------------------------------------------|------------------------------|
| 10Cu45Ce45Zr b       | 37                                          | 0.11                                           | 12                            | 51                                          | 0.11                                         | 9.2                          |
| 10Cu45Ce45Zr a       | 39                                          | 0.14                                           | 9.9                           | 46                                          | 0.13                                         | 3.7                          |
| 1Ag9Cu45Ce45Zr b     | 27                                          | 0.10                                           | 13                            | 39                                          | 0.10                                         | 9.2                          |
| 1Ag9Cu45Ce45Zr a     | 40                                          | 0.12                                           | 12                            | 36                                          | 0.14                                         | 3.7                          |
| 2Ag8Cu22.5Ce67.5Zr b | 24                                          | 0.12                                           | 20                            | 30                                          | 0.12                                         | 9.2                          |
| 2Ag8Cu22.5Ce67.5Zr a | 37                                          | 0.14                                           | 15                            | 27                                          | 0.14                                         | 3.7                          |
| 2Ag8Cu45Ce45Zr b     | 28                                          | 0.10                                           | 14                            | 39                                          | 0.10                                         | 9.2                          |
| 2Ag8Cu45Ce45Zr a     | 28                                          | 0.09                                           | 13                            | 32                                          | 0.13                                         | 3.7                          |
| 2Ag8Cu67.5Ce22.5Zr b | 49                                          | 0.18                                           | 15                            | 67                                          | 0.18                                         | 9.2                          |
| 2Ag8Cu67.5Ce22.5Zr a | 93                                          | 0.27                                           | 12                            | 69                                          | 0.28                                         | 3.7                          |

\*<sup>1</sup> Surface area, \*<sup>2</sup> Pore volume, \*<sup>3</sup> Pore diameter, b: before, a: after the reaction

**Table S3 Elemental analysis of 2Ag8Cu67.5Ce22.5Zr catalyst before and after reaction by XRF**

|                   | <b>CeO<sub>2</sub></b> | <b>ZrO<sub>2</sub></b> | <b>CuO</b>   | <b>Ag</b>   |
|-------------------|------------------------|------------------------|--------------|-------------|
| <b>Before (%)</b> | <b>55.84</b>           | <b>30.90</b>           | <b>10.34</b> | <b>2.92</b> |
|                   | <b>CeO<sub>2</sub></b> | <b>ZrO<sub>2</sub></b> | <b>Cu</b>    | <b>Ag</b>   |
| <b>After (%)</b>  | <b>54.32</b>           | <b>33.01</b>           | <b>9.54</b>  | <b>3.13</b> |

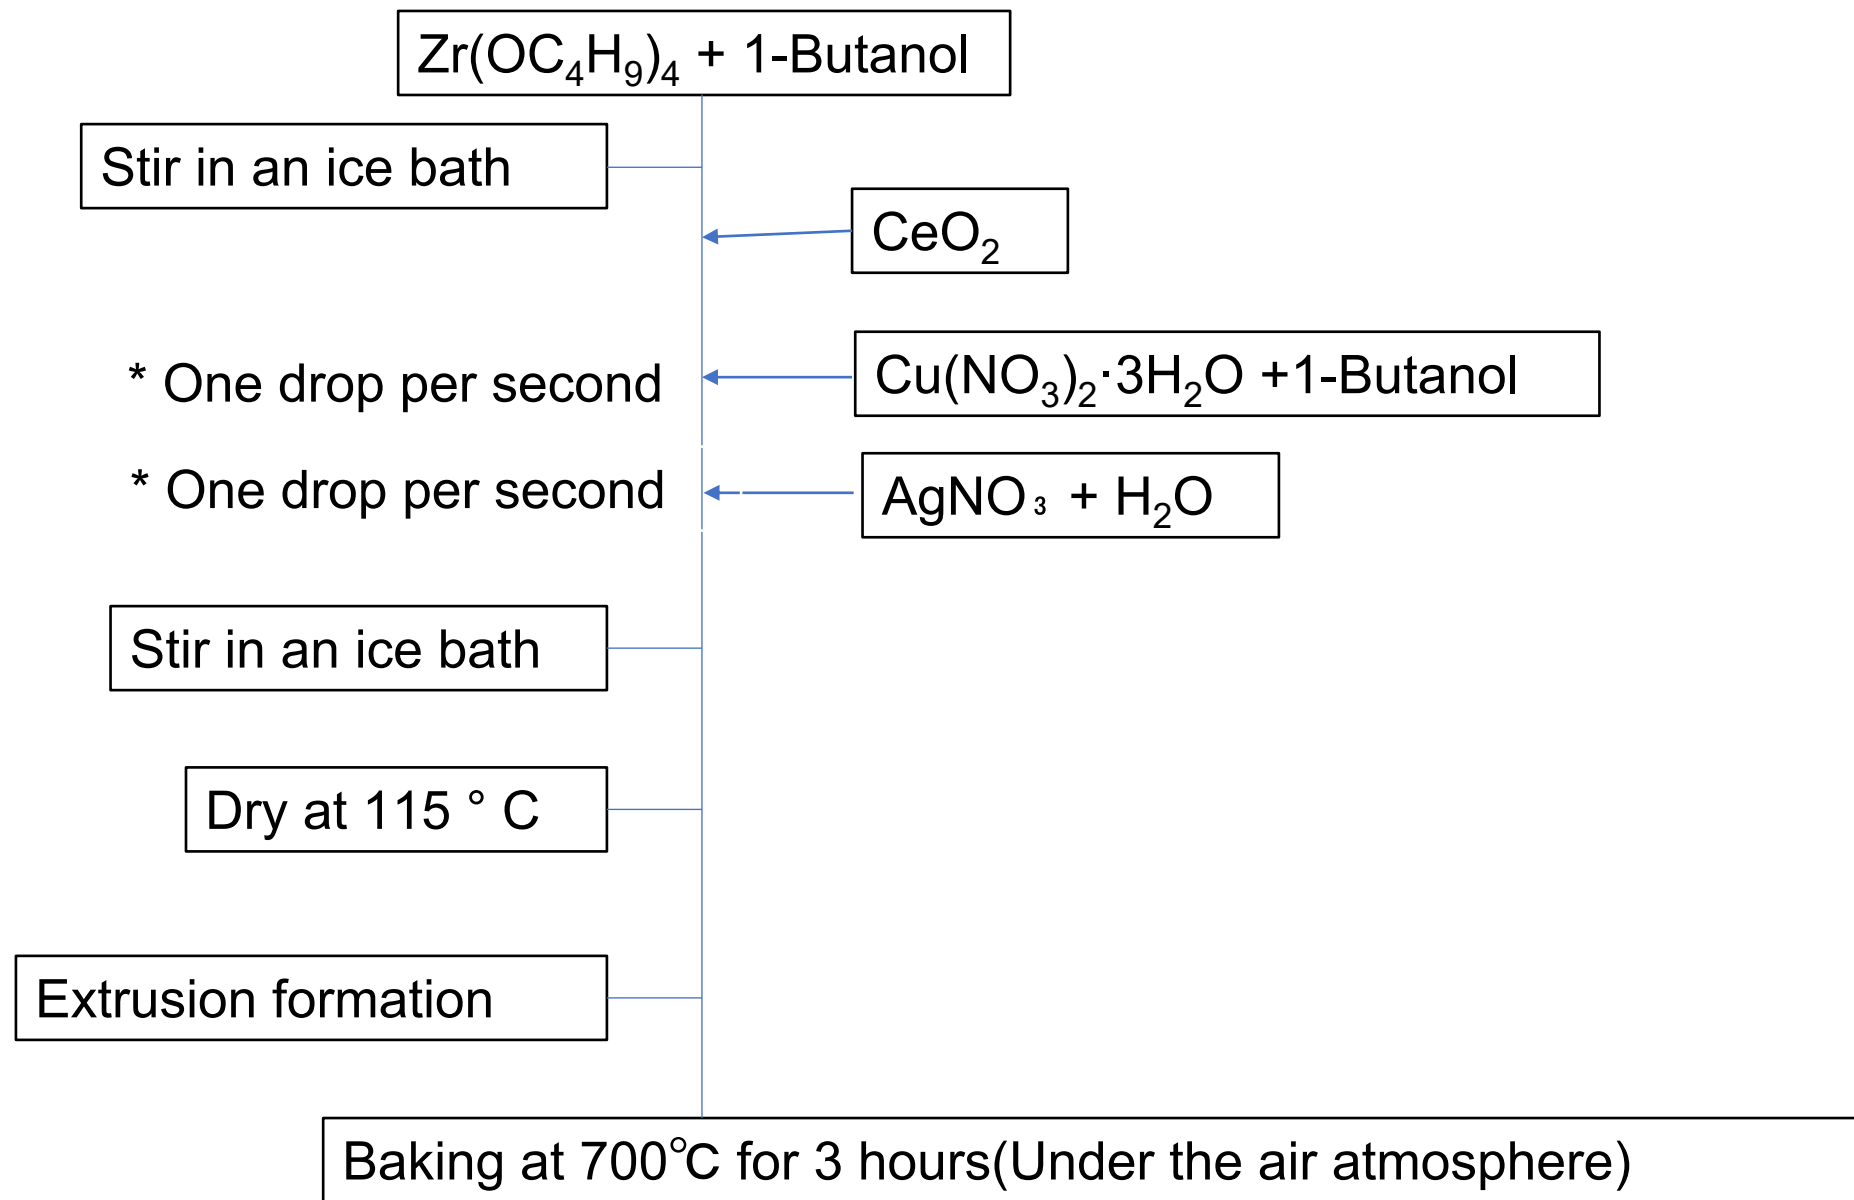

Fig. S1 A flowchart of preparation of CuCeO<sub>2</sub>ZrO<sub>2</sub> and AgCuCeO<sub>2</sub>ZrO<sub>2</sub> catalysts

## Footnote of Fig. S1

2Ag8Cu45Ce45Zr catalyst as an example was prepared as follows: First, zirconium (IV) butoxide (8.76 g) and 1-butanol (9.95 g) were placed into a beaker (200 ml) and stirred on a magnetic stirrer with a hot plate, and ceria (2.25 g) was added to obtain a mixture including support components. Next, a solution of copper nitrate trihydrate (1.52 g) and 1-butanol (5.57 g) prepared was dropwise added to the mixture with a Pasteur pipette at 0°C by one drop per second. Further, silver nitrate(I) (0.16 g) dissolved in water (0.32 g) was also dropwise added to the mixture with a Pasteur pipette at 0°C by one drop per second. The resulted mixture was stirred for 1 hour at 0 °C and then heated to 115 °C using an oil bath with stirring. Thereafter, the obtained gel was heated with heating rate of 5°C/min and was calcined at 700°C for 3 hours in an air atmosphere. In naming 2Ag8Cu45Ce45Zr, 2 means wt% of silver metal, 8 means wt% of copper metal, 45 before Ce means wt% of CeO<sub>2</sub> and 45 before Zr means wt% of ZrO<sub>2</sub>. Other CuCeO<sub>2</sub>ZrO<sub>2</sub> and AgCuCeO<sub>2</sub>ZrO<sub>2</sub> catalysts were prepared similarly.

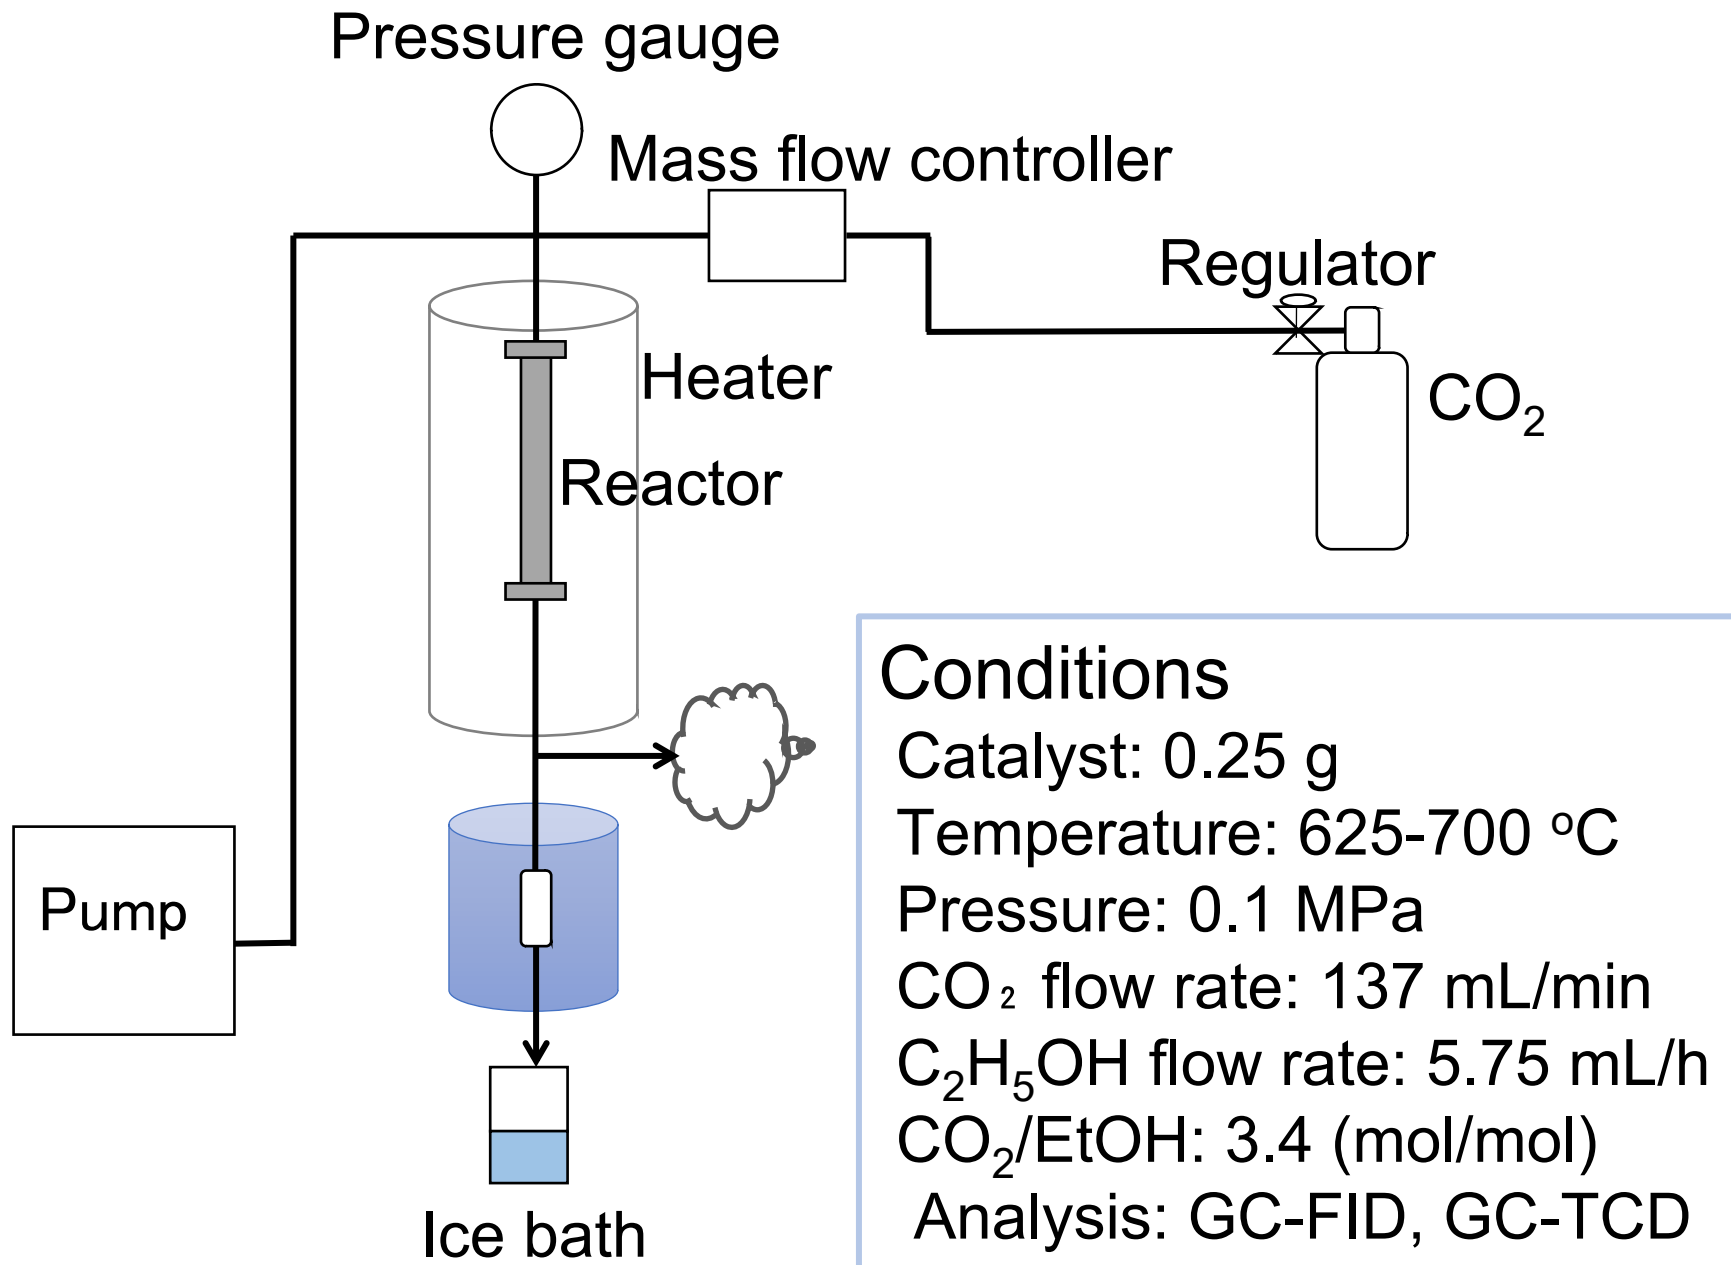

**Fig. S2 Reaction apparatus for dry reforming of ethanol**

## Footnote of Fig. S2

Dry reforming of ethanol is shown in eq. (1).

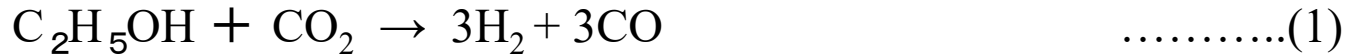

Ethanol and  $\text{CO}_2$  conversions were calculated on the basis of eqs. (2) and (3), respectively.

$$\begin{aligned} &\text{Ethanol conversion (\%)} \\ &= 100 \times (\text{W}(\text{EtOH})_{\text{int}} (\text{g}) - \text{W}(\text{EtOH})_{\text{prod}} (\text{g})) / \text{W}(\text{EtOH})_{\text{int}} (\text{g}) \quad \dots\dots\dots(2) \end{aligned}$$

where  $\text{W}(\text{EtOH})_{\text{int}}$  is the weight of ethanol introduced and  $\text{W}(\text{EtOH})_{\text{prod}}$  is the weight of ethanol in liquid product.

$$\begin{aligned} &\text{CO}_2 \text{ conversion (\%)} = \\ &100 \times (\text{W}(\text{CO}_2)_{\text{int}} (\text{g}) - \text{W}(\text{CO}_2)_{\text{prod}} (\text{g})) / \text{W}(\text{CO}_2)_{\text{int}} (\text{g}) \quad \dots\dots\dots(3) \end{aligned}$$

where  $\text{W}(\text{CO}_2)_{\text{int}}$  is the weight of  $\text{CO}_2$  introduced and  $\text{W}(\text{CO}_2)_{\text{prod}}$  is the weight of  $\text{CO}_2$  in gas product.

$\text{H}_2$  and  $\text{CO}$  yields were calculated on the basis of eqs. (4), (5) and (6).

$$\text{Yield of H}_2 (\%) = 100 \times \text{H}_2 \text{ in product (mol)} / 3 \times \text{EtOH}_{\text{conv}}(\text{mol}) \quad \dots\dots\dots(4)$$

$$\begin{aligned} &\text{Yield of CO (\%)} = 100 \times \text{CO in product (mol)} / (\text{CO}_2\text{conv}(\text{mol}) + 2 \times \text{EtOH}_{\text{conv}}(\text{mol})) \\ &\dots\dots\dots(5) \end{aligned}$$

$$\text{EtOH}_{\text{conv}}(\text{mol}) = (\text{EtOH}_{\text{int}}(\text{mol}) - \text{EtOH}_{\text{prod}}(\text{mol})) \quad \dots\dots\dots(6)$$

where  $\text{CO}_2\text{conv}$ :  $\text{CO}_2$  converted;  $\text{EtOH}_{\text{conv}}$ : Ethanol converted;  $\text{EtOH}_{\text{int}}$ : Ethanol introduced;  $\text{EtOH}_{\text{prod}}$ : Ethanol in liquid product

**Reverse water gas shift reaction**

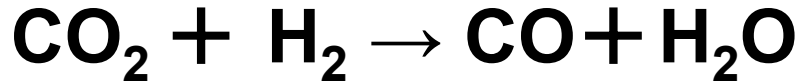

**Decomposition of ethanol**

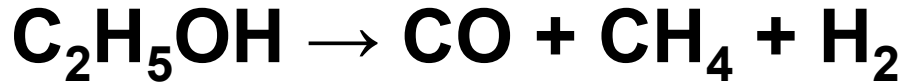

**Decomposition of methane**

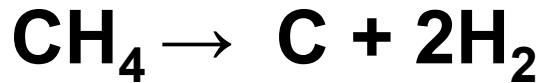

**Dry reforming of methane**

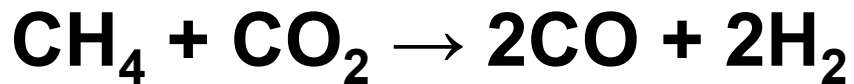

**Fig. S3 Side reactions**
